# Supplementary material
Source: Springer Nature journal article supplement (https://www.springermedizin.de/resource/supplementary/12958_2012_1006_MOESM3_ESM.pdf/9566588)
Supplement: MOESM3 [file 9566588]

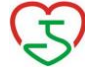

## Certificate from *Medjaden Bioscience Limited*

Dear Sir or Madam:

This document certifies that the manuscript, *Obesity does not aggravate vitrification injury in mouse embryos: a prospective study*, was edited for proper English language, grammar, punctuation, spelling, and overall style by highly qualified native English speaking and professional scientific editors at *Medjaden Bioscience Limited* on 30<sup>th</sup> Jul. 2012. Neither the research content nor the authors' intentions were altered in any way during the editing process.

Yours sincerely,

(Miss) Selin Ho

for *Medjaden*

*Medjaden Bioscience Limited*

General Office

Room 2001-4, China Insurance Group Building,

141 Des Voeux Road Central, Hong Kong

Tel: +852 81350971; Fax: +852 81350972

Email: medjaden@yahoo.com; medjaden@gmail.com; medjadenEN@gmail.com

Website: www.medjaden.com

### **Information about *Medjaden Bioscience Limited*:**

*Medjaden* is an emerging editing company that provides professional services for laboratory researchers, postgraduates, and clinical doctors. Our mission is to help our clients maximize and accelerate the production of articles from their research work, or turn their pieces of work into an article. The company employs experienced medical statisticians, writers, and editors drawn from both Chinese and English backgrounds worldwide, who strive to ensure every edited article is published in an English journal, preferably a journal that is included in The Institute for Scientific Information (ISI) Citation Database, the Science Citation Index (SCI) Expanded, Index Medicus (IM), Medline, PubMed, EMBASE/Excerpta Medica, and other scientific resources.
